# Supplementary material
Source: MDPI journal article supplement (https://www.mdpi.com/1424-2818/14/6/417)
Supplement: s1 [file s1]

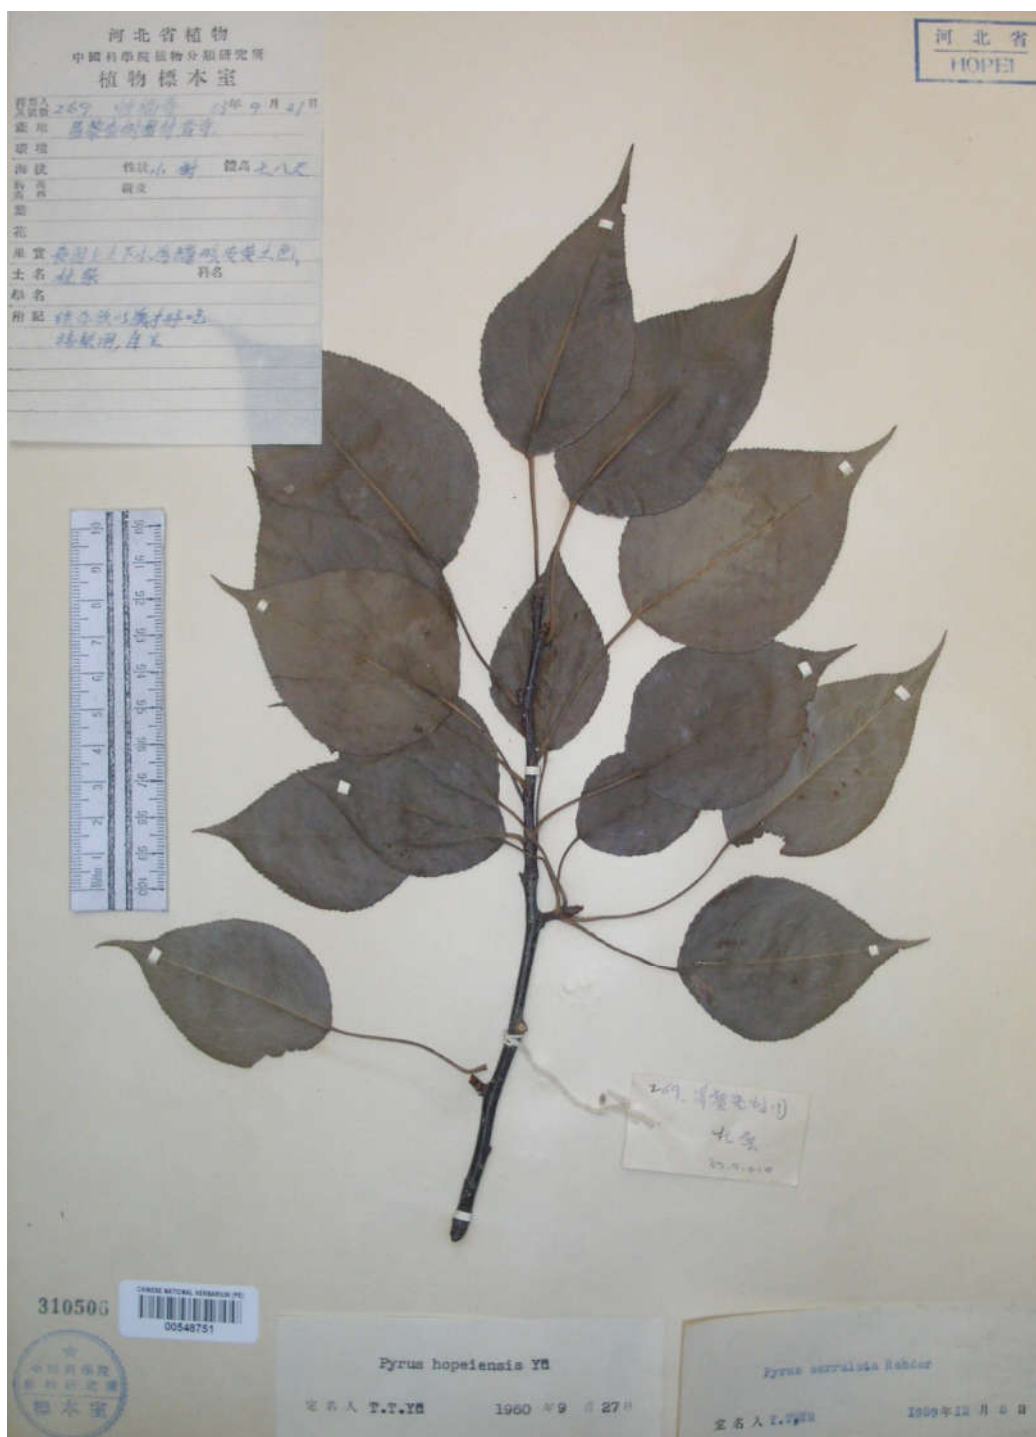

**Figure S1.** Paratype of *Pyrus hopeiensis*. FS Chang 269, PE barcode: 00548751.

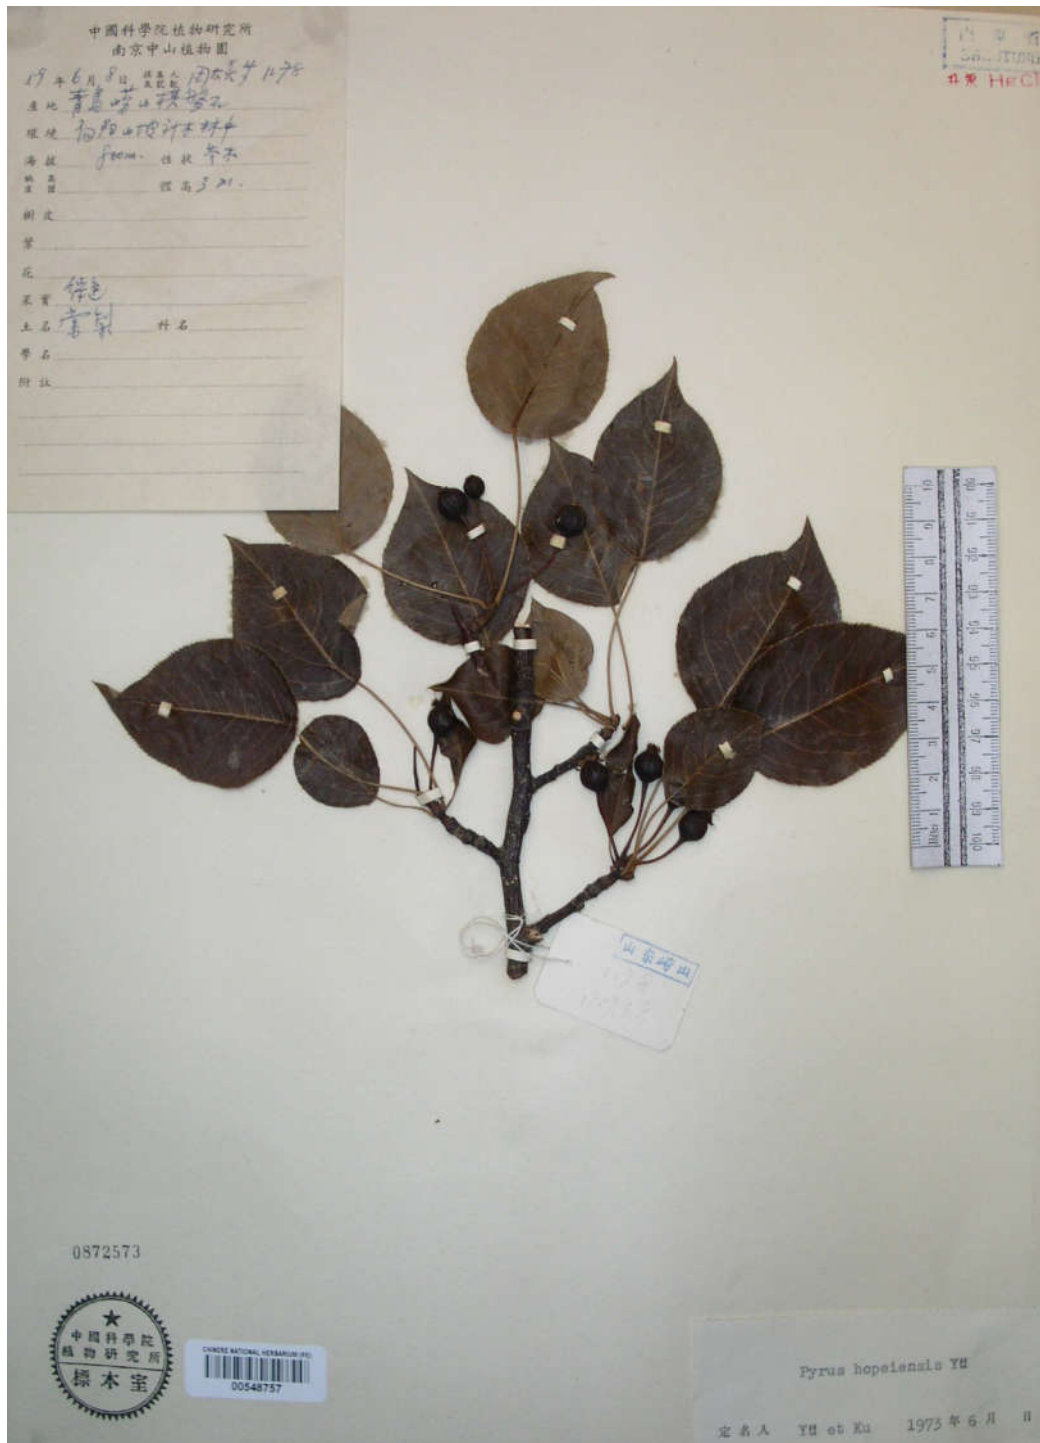

**Figure S2.** Specimen of *Pyrus hopeiensis*. TY Zhou et al., 1178, PE barcode: 00548757.

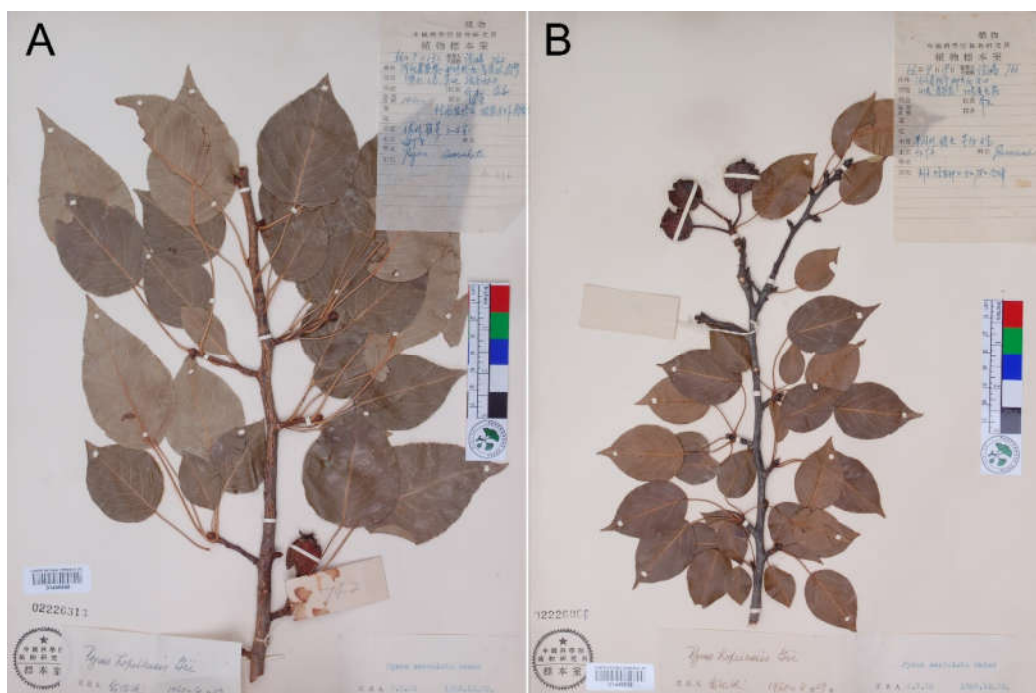

**Figure S3.** Specimens of *Pyrus hopeiensis*. A: *P* Zhang 742 (PE barcode: 01448598), B: *P* Zhang 766 (PE barcode: 01449638).
